# Supplementary material for: Improving the mechanical properties of cellulose diacetate fibers via using an ionic liquid as processing solvent
Source: Royal Society of Chemistry journal article supplement (doi:10.1039/c5ra21583h), 2015-12-15
Supplement: c5ra21583h1.pdf [file c5ra21583h1.pdf]

## Supporting Information

Improving the mechanical properties of cellulose diacetate fibers via using an ionic  
liquid as processing solvent

Na Liu<sup>1</sup>, Baochun Wang<sup>1</sup>, Shiyang Chen<sup>1</sup>, Fuyou Ke<sup>1</sup>, Ye Chen<sup>1</sup>, Qibing Pei<sup>2</sup>, Huaping  
Wang<sup>1\*</sup>

<sup>1</sup>State Key Laboratory for Modification of Chemical Fibers and Polymer Materials,  
College of Materials Science and Engineering, Donghua University, Shanghai  
201620, P. R. China

<sup>2</sup>Department of Materials Science and Engineering, University of California, Los  
Angeles, California 90095, USA

\* Corresponding author: wanghp@dhu.edu.cn

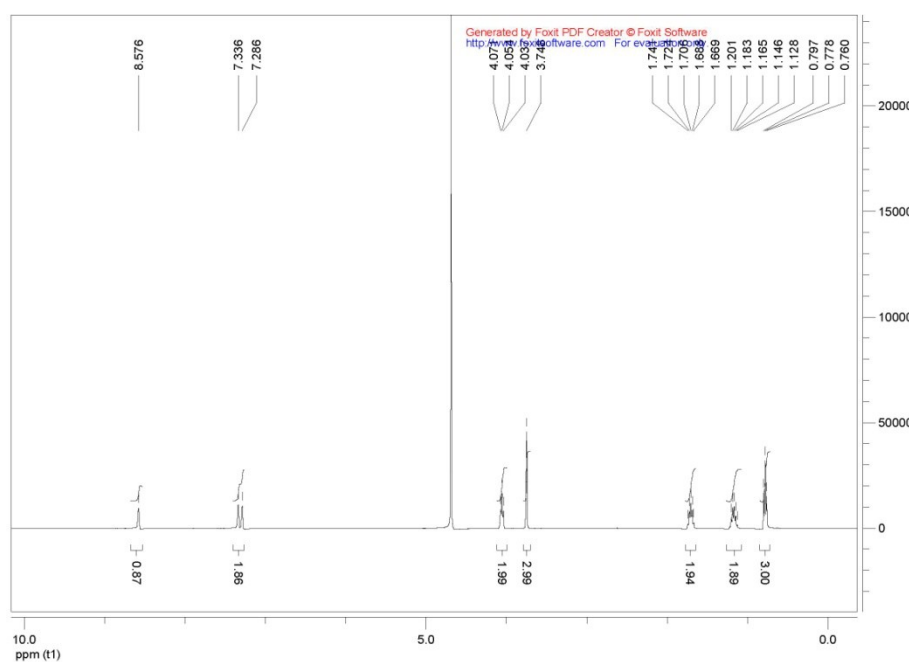

(a)

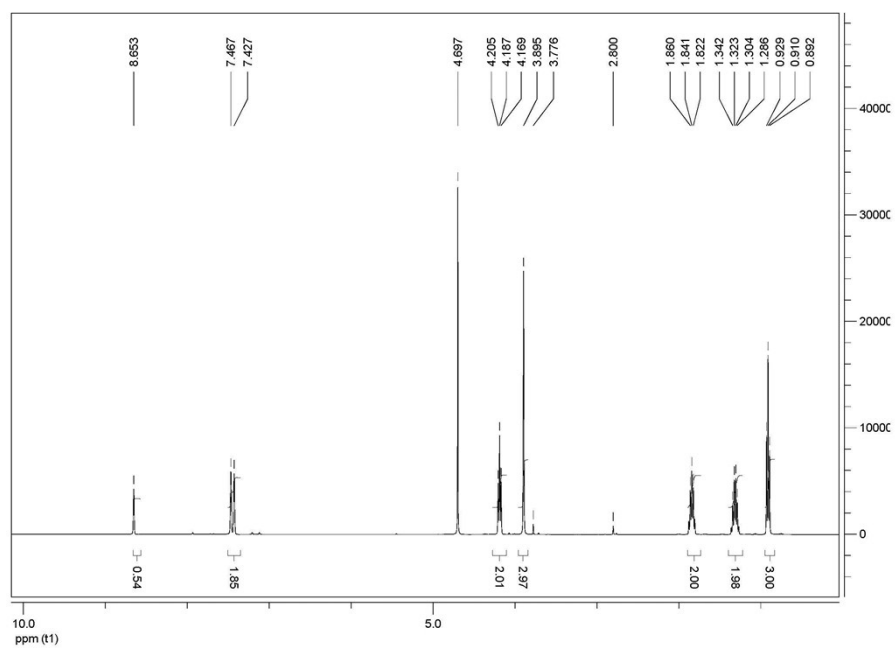

(b)

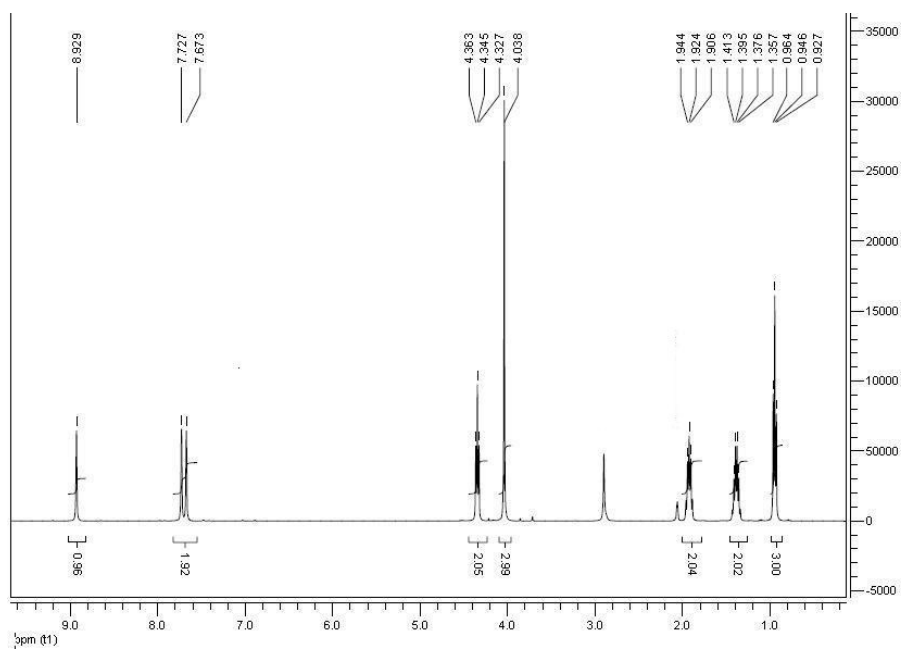

(c)

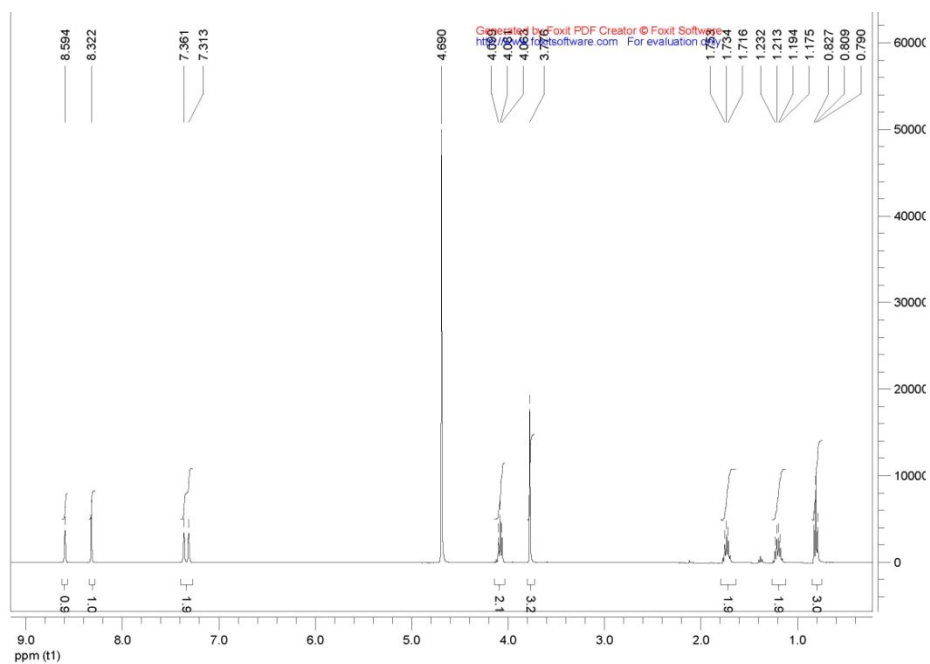

(d)

Fig. S1  $^1\text{H}$ NMR spectra for [BMIM]Cl ( $\text{D}_2\text{O}$ ) (a), [BMIM]BF<sub>4</sub> ( $\text{D}_2\text{O}$ ) (b), [BMIM]PF<sub>6</sub> ( $\text{CD}_3\text{COCD}_3$ ) (c) and [BMIM]COOH ( $\text{D}_2\text{O}$ ) (d).

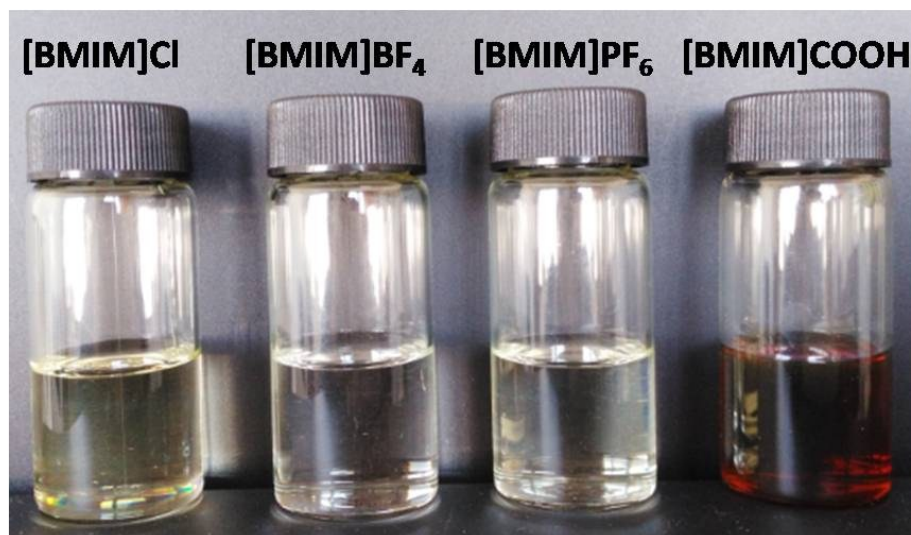

Fig. S2 Photograph for [BMIM]Cl, [BMIM]BF<sub>4</sub>, [BMIM]PF<sub>6</sub> and [BMIM]COOH.
